# Supplementary material for: Diversity of Potentially Pathogenic Escherichia coli O104 and O9 Serogroups Isolated before 2011 from Fecal Samples from Children from Different Geographic Regions
Source: MDPI journal article supplement (doi:10.3390/microorganisms9112227), 2021-10-26
Supplement: s1 [file s1]

Supplementary Table S1. Agglutination titers of anti-O9 and O104 sera without unabsorbed and absorbed.

| Antigens            | Titers of unabsorbed sera |           | Titers of absorbed sera |                   |
|---------------------|---------------------------|-----------|-------------------------|-------------------|
|                     | Anti-O9                   | Anti-O104 | Anti-O9                 | Anti-O104         |
| Absorbed with       |                           |           | <i>E. coli</i> O104     | <i>E. coli</i> O9 |
| <i>E. coli</i> O9   | 1:1600                    | 1:200     | 1:400                   | -                 |
| <i>E. coli</i> O104 | 1:400                     | 1:1600    | -                       | 1:400             |

Serum was absorbed with boiled antigen for 1 h.
